# Supplementary material for: Real life Experience of Medical Cannabis Treatment in Autism: Analysis of Safety and Efficacy
Source: PubMed Central journal article supplement (PMC6336869; doi:10.1038/s41598-018-37570-y), 2019-01-17

**REAL LIFE EXPERIENCE OF MEDICAL CANNABIS TREATMENT IN AUTISM:  
ANALYSIS OF SAFETY AND EFFICACY.**

Lihl Bar-Lev Schleider MA<sup>1,2</sup>, Raphael Mechoulam PhD<sup>3</sup>, Naama Saban<sup>2</sup>, Gal Meiri MD  
MHA<sup>4,5</sup>, \*Victor Novack MD PhD<sup>1</sup>.

<sup>1</sup> Clinical Cannabis Research Institute, Soroka University Medical Center and Faculty of Health Sciences, Ben-Gurion University of the Negev, Be'er-Sheva, Israel.

<sup>2</sup> Research Department, Tikun Olam LTD.

<sup>3</sup> Institute for Drug Research, School of Pharmacy, the Hebrew University of Jerusalem, Israel.

<sup>4</sup> Negev Autism Centre, Ben-Gurion University of the Negev, Beer Sheva, Israel

<sup>5</sup> Soroka University Medical and Faculty of Health Sciences, Ben-Gurion University of the Negev, Beer Sheva, Israel

Corresponding author – Victor Novack - [VictorNo@clalit.org.il](mailto:VictorNo@clalit.org.il)

**Supplementary figure S1: Distribution of cannabinoids consumptions.** Total CBD (in mg) consumed at every intake by 66 patients receiving oil with 30% CBD and 1.5% THC. THC is 1/20 of the amount of CBD.

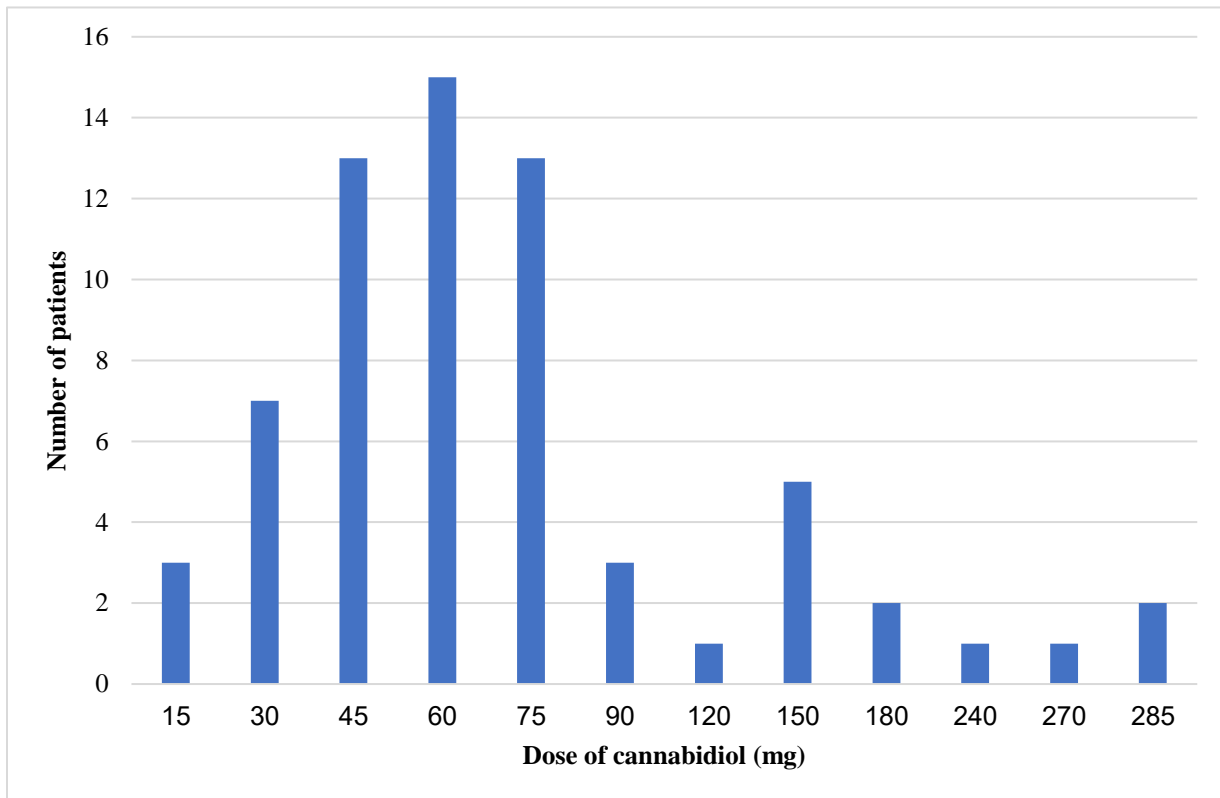

**Supplementary figure S2: Quality of life assessment.** Quality of life was assessed prior to and six months after initiation of cannabis treatment.  $p < 0.001$

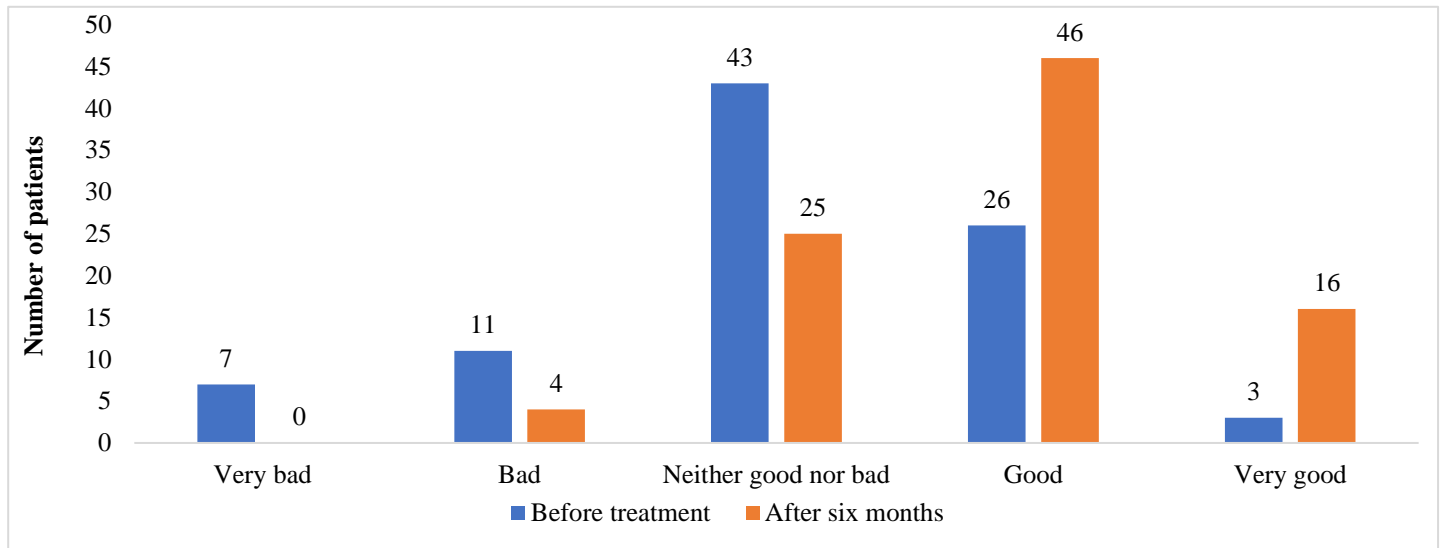

Supplement: 41598_2018_37570_MOESM1_ESM.pdf [file 41598_2018_37570_MOESM1_ESM.pdf]
